# Supplementary material for: Downregulation of TAP38/PPH1 enables LHCII hyperphosphorylation in Arabidopsis mutant lacking LHCII docking site in PSI
Source: PubMed Central journal article supplement — FEBS Lett. 2016 Mar 8;590(6):787–94. doi: 10.1002/1873-3468.12117 (PMC5021135; doi:10.1002/1873-3468.12117), 2016-03-08
Supplement: FEB2-590-787-s002.pdf [file FEB2-590-787-s002.pdf]

| Genotype | Average | Stdev |
|----------|---------|-------|
| WT D     | 13      | 5     |
| WT LL    | 100     | 0     |
| WT HL    | 6       | 7     |

|                 |     |     |
|-----------------|-----|-----|
| <i>tap38</i> D  | 227 | 193 |
| <i>tap38</i> LL | 100 | 0   |
| <i>tap38</i> HL | 43  | 18  |

|                |     |    |
|----------------|-----|----|
| <i>psal</i> D  | 73  | 11 |
| <i>psal</i> LL | 100 | 0  |
| <i>psal</i> HL | 35  | 6  |

|       | 1st biol replic. | 2nd biol replic. | 3rd biol replic. |
|-------|------------------|------------------|------------------|
| WT D  | 107251           | 7570490          | 47168            |
| WT LL | 586053           | 89084888         | 403646           |
| WT HL | 8234             | 1074011          | 56675            |

|                 |        |           |        |
|-----------------|--------|-----------|--------|
| <i>tap38</i> D  | 444551 | 100798032 | 496054 |
| <i>tap38</i> LL | 377343 | 22377728  | 428270 |
| <i>tap38</i> HL | 238212 | 14310813  | 140081 |

|                |        |           |         |
|----------------|--------|-----------|---------|
| <i>psal</i> D  | 575781 | 239984176 | 750936  |
| <i>psal</i> LL | 685341 | 381439008 | 1052914 |
| <i>psal</i> HL | 283139 | 125370392 | 318132  |

Table S1. The changes in the level of LHCII phosphorylation within WT, *tap38* and *psal* upon short-term light shifts. The pLHCII level in each genotype is compared to the level observed in LL.

WT, *tap38* and *psal* mutants were adapted to darkness for 16 hours and subsequently exposed to low light for 2.5 hours and eventually to high light for another 2.5 hours. Thylakoids were isolated after each light treatment and fractionated with SDS-PAGE. The accumulation of pLHCII was demonstrated with a P-Thr antibody and the relative changes in the phosphorylation level of LHCII within WT, *tap3* and *psal* were quantified by normalizing the band intensities to the low light sample of each genotype. The average and standard deviation of the normalized data from three biological replicates is presented. The raw volumes of the pLHCII band intensities are also included.
